# Supplementary material for: Activation of Dendritic Cells by the Novel Toll-Like Receptor 3 Agonist RGC100
Source: Hindawi journal article supplement (doi:10.1155/2013/283649), 2013-01-01
Supplement: f1 [file 283649.f1.pdf]

# Fig. S1

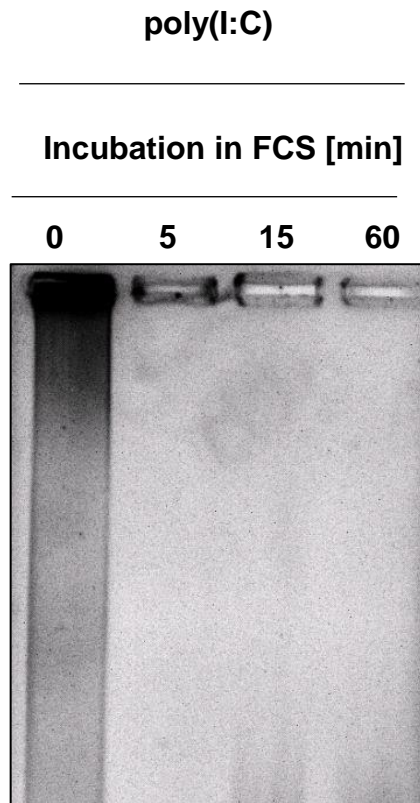

Strictly confidential
